# Supplementary material
Source: Springer Nature journal article supplement (https://www.springermedizin.de/resource/supplementary/13054_2010_8656_MOESM21_ESM.pdf/9732494)

(A) MV vs NMV (late)

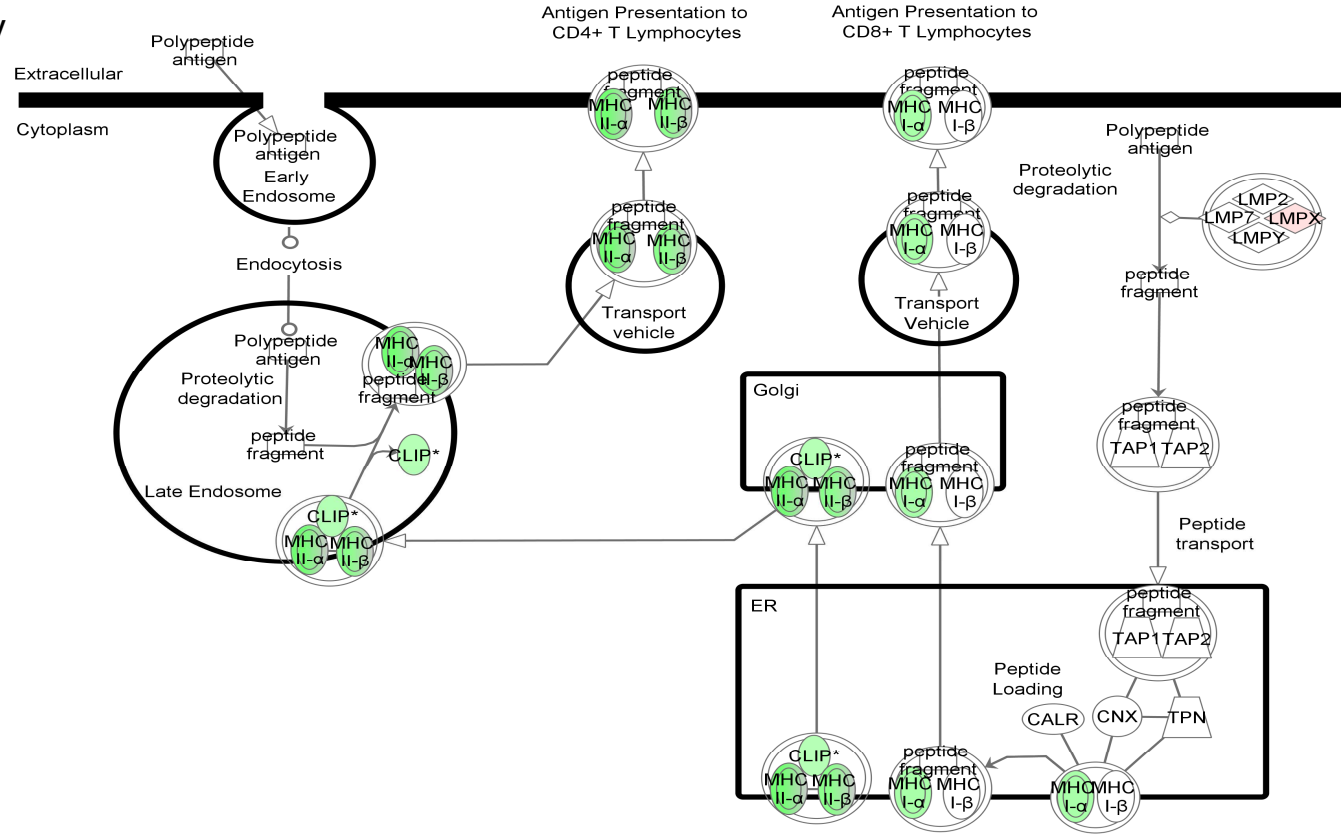

(B) MV vs NMV (early)

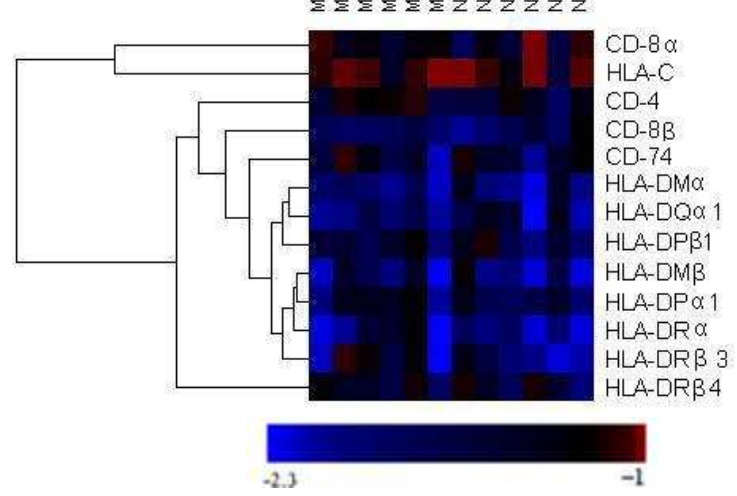

(C) MV vs NMV (late)

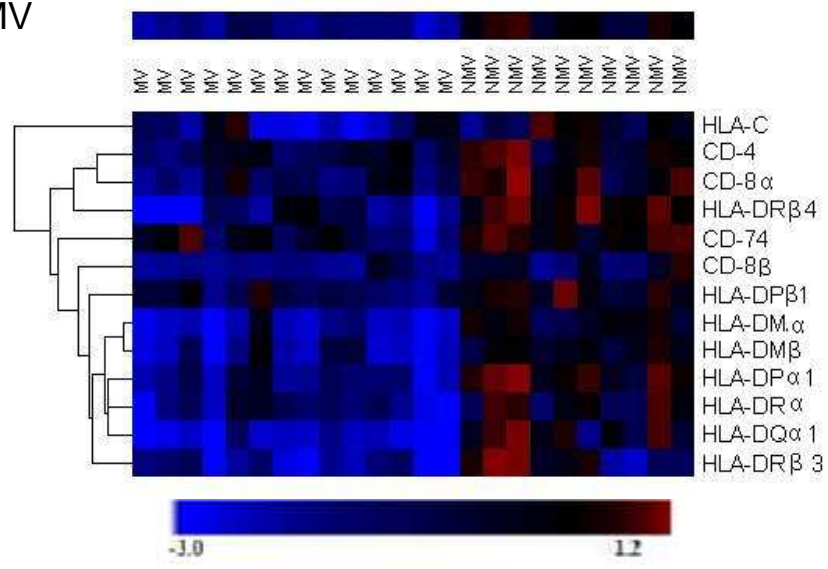

Supplement: MOESM21 [file 9732494]
